# Supplementary material
Source: publisher figshare collection journal article supplement (https://springernature.figshare.com/ndownloader/files/23392493)

Quicksort ( $m = 100$ )

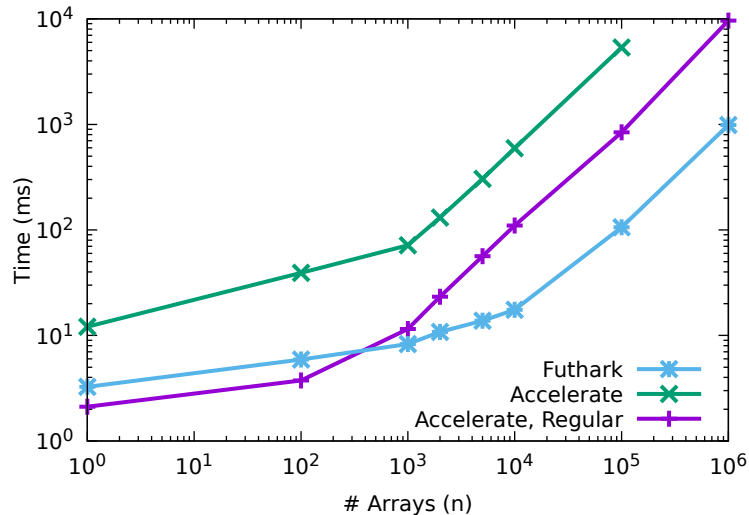

Supplement: Supplementary file 1 [file 23392493]

Quicksort ( $m = 1000$ )

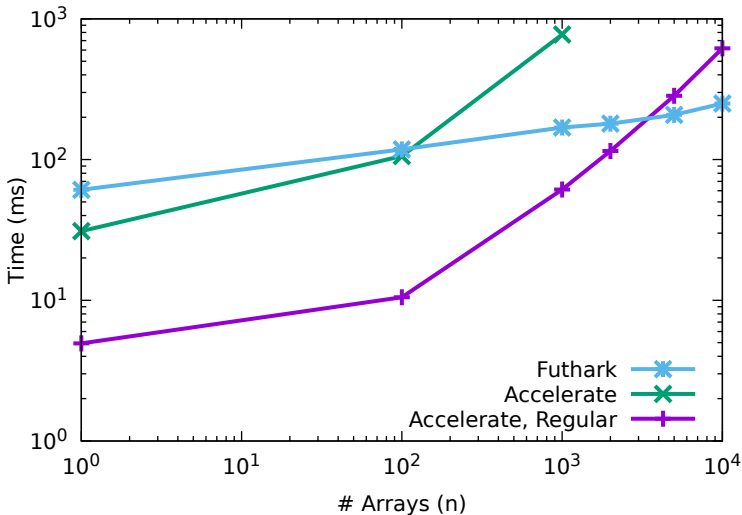

Supplement: Supplementary file 2 [file 23392493]

# Fourier transform (32 x 32)

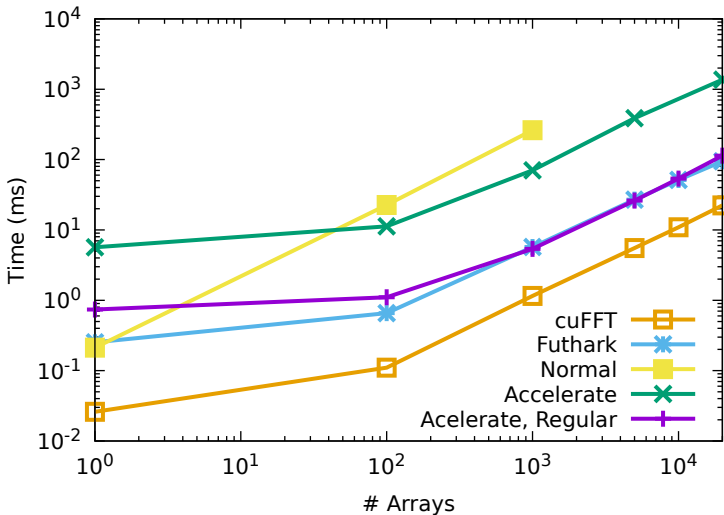

Supplement: Supplementary file 3 [file 23392493]

Quicksort ( $m = 10000$ )

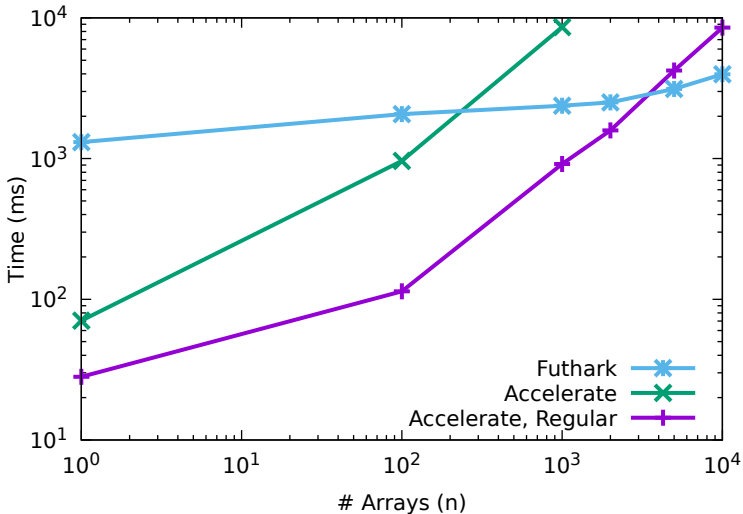

Supplement: Supplementary file 5 [file 23392493]
